# Supplementary material for: Modulating anti-inflammatory and anticancer properties by designing a family of metal-complexes based on 5-nitropicolinic acid
Source: Royal Society of Chemistry journal article supplement (doi:10.1039/d4dt00265b), 2024-01-01
Supplement: d4dt00265b1.pdf [file d4dt00265b1.pdf]

## Supporting Information

### Modulating anti-inflammatory and anticancer properties by designing a family of metal-complexes based on 5-nitropicolinic acid

Amalia García-García,<sup>\*a</sup> Marta Medina-O'donnell,<sup>b</sup> Sara Rojas,<sup>a</sup> Mariola Cano-Merenilla,<sup>b</sup> Juan Morales,<sup>c</sup> M. Mar Quesada-Moreno,<sup>c</sup> Juan Sainz,<sup>b</sup> Iñigo J. Vitorica-Yrezabal,<sup>a</sup> Antonio Rodríguez-Diéguez,<sup>a</sup> Amparo Navarro <sup>\*c</sup> and Fernando J. Reyes-Zurita <sup>\*b</sup>

#### Table of contents

|      |                                                 |     |
|------|-------------------------------------------------|-----|
| S1.  | Selected bond length and angles.....            | S2  |
| S2.  | Infrared spectroscopy.....                      | S4  |
| S3.  | Photophysical properties.....                   | S5  |
| S4.  | Cytotoxicity in cancer cell lines.....          | S9  |
| S5.  | Chemical stability in solution.....             | S10 |
| S6.  | Cytotoxic mechanism .....                       | S11 |
| S7.  | Anti-inflammatory studies.....                  | S12 |
| S8.  | Elemental analysis .....                        | S13 |
| S9.  | Single-crystal X-ray crystallographic data..... | S14 |
| S10. | Theoretical calculations.....                   | S15 |

## S1. Selected bond length and angles

**Table S1** Selected bond lengths (Å) and angles (°) of coordination spheres for **1-6**.

| Comp.    | Bond   | Distance (Å) | Atoms      | Angle (°)  |
|----------|--------|--------------|------------|------------|
| <b>1</b> | Mn-N1A | 2.273(5)     | O1A-Mn-N1A | 101.99(19) |
|          | Mn-O1A | 2.147(4)     | O1A-Mn-O2A | 92.92(18)  |
|          | Mn-O2A | 2.168(5)     | O1A-Mn-N1B | 88.89(18)  |
|          | Mn-N1B | 2.295(5)     | O1A-Mn-O1B | 88.91(18)  |
|          | Mn-O1B | 2.167(5)     | O2A-Mn-N1A | 73.87(18)  |
|          | Mn-O2B | 2.176(5)     | O2A-Mn-N1B | 105.77(19) |
|          |        |              | O2A-Mn-O2B | 83.99(18)  |
|          |        |              | O1B-Mn-N1A | 89.37(19)  |
|          |        |              | O1B-Mn-N1B | 90.99(18)  |
|          |        |              | O1B-Mn-O2B | 99.57(18)  |
| <b>2</b> |        |              | O2B-Mn-N1A | 95.52(18)  |
|          |        |              | O2B-Mn-N1B | 73.70(18)  |
|          | Cd-N1A | 2.347(8)     | O1A-Cd-N1A | 71.7(3)    |
|          | Cd-O1A | 2.287(7)     | O1A-Cd-O2A | 99.5(2)    |
|          | Cd-O2A | 2.309(7)     | O1A-Cd-N1B | 96.0(3)    |
|          | Cd-N1B | 2.323(8)     | O1A-Cd-O1B | 81.9(2)    |
|          | Cd-O1B | 2.296(7)     | O2A-Cd-N1A | 88.0(3)    |
|          | Cd-O2B | 2.252(7)     | O2A-Cd-N1B | 89.5(3)    |
|          |        |              | O2A-Cd-O2B | 86.3(2)    |
|          |        |              | O1B-Cd-N1A | 109.4(3)   |
| <b>3</b> |        |              | O1B-Cd-N1B | 72.3(3)    |
|          |        |              | O1B-Cd-O2B | 99.0(2)    |
|          |        |              | O2B-Cd-N1A | 88.3(3)    |
|          |        |              | O2B-Cd-N1B | 104.3(3)   |
|          | Cu-N1  | 1.949(4)     | O1-Cu-N1   | 84.05(15)  |
|          | Cu-O1  | 1.943(3)     | O1-Cu-N1'  | 95.95(15)  |
| <b>4</b> | Cu-O4  | 2.708(4)     | O1-Cu-O4   | 94.90(13)  |
|          |        |              | O1-Cu-O4'  | 85.10(13)  |
|          |        |              | N1-Cu-O4   | 87.97(14)  |
|          |        |              | N1-Cu-O4'  | 92.03(14)  |
| <b>5</b> | Co-N1  | 2.147(5)     | O1-Co-N1   | 79.09(16)  |
|          | Co-O1  | 2.062(4)     | O1-Co-N1'  | 100.91(16) |
|          | Co-O1W | 2.075(4)     | O1-Co-O1W  | 89.32(14)  |
|          |        |              | O1-Co-O1W' | 90.68(14)  |
|          |        |              | O1W-Co-N1  | 87.07(16)  |
| <b>6</b> |        |              | O1W-Co-N1' | 92.93(16)  |
|          | Ni-N1  | 2.084(4)     | O1-Ni-N1   | 80.67(14)  |
|          | Ni-O1  | 2.049(3)     | O1-Ni-N1'  | 99.33(14)  |
|          | Ni-O1W | 2.054(3)     | O1-Ni-O1W  | 90.97(13)  |
|          |        |              | O1-Ni-O1W' | 89.03(13)  |
| <b>6</b> |        |              | O1W-Ni-N1  | 93.01(14)  |
|          |        |              | O1W-Ni-N1' | 86.99(14)  |
|          | Zn-N1  | 2.152(3)     | O1-Zn-N1   | 79.36(9)   |
|          | Zn-O1  | 2.065(2)     | O1-Zn-N1'  | 100.64(9)  |
|          | Zn-O1W | 2.115(2)     | O1-Zn-O1W  | 89.35(9)   |
|          |        | O1-Zn-O1W'   | 90.65(9)   |            |
|          |        | O1W-Zn-N1    | 87.21(10)  |            |
|          |        | O1W-Zn-N1'   | 92.79(10)  |            |

**Table S2** Hydrogen bonds distances (Å) and angles (°) for **4-6**.

| Comp.    | D-H...A <sup>a</sup> | D-H distance | H...A distance | D-H...A distance | Angle (°) |
|----------|----------------------|--------------|----------------|------------------|-----------|
| <b>4</b> | O1W-H1WA...O1        | 0.90         | 1.80           | 2.681(5)         | 164.2     |

|          |               |      |      |           |       |
|----------|---------------|------|------|-----------|-------|
|          | O1W-H1WB...O2 | 0.84 | 1.87 | 2.655 (5) | 153.2 |
| <b>5</b> | O1W-H1WA...O1 | 0.91 | 1.82 | 2.700 (5) | 161.7 |
|          | O1W-H1WB...O2 | 0.85 | 1.86 | 2.665(5)  | 156.5 |
| <b>6</b> | O1W-H1WA...O1 | 0.94 | 1.82 | 2.706(3)  | 156.3 |
|          | O1W-H1WB...O2 | 0.91 | 1.80 | 2.674(3)  | 160.3 |

<sup>(a)</sup>D, donor atom; H, hydrogen atom; A, acceptor atom.

## S2. Infrared spectroscopy

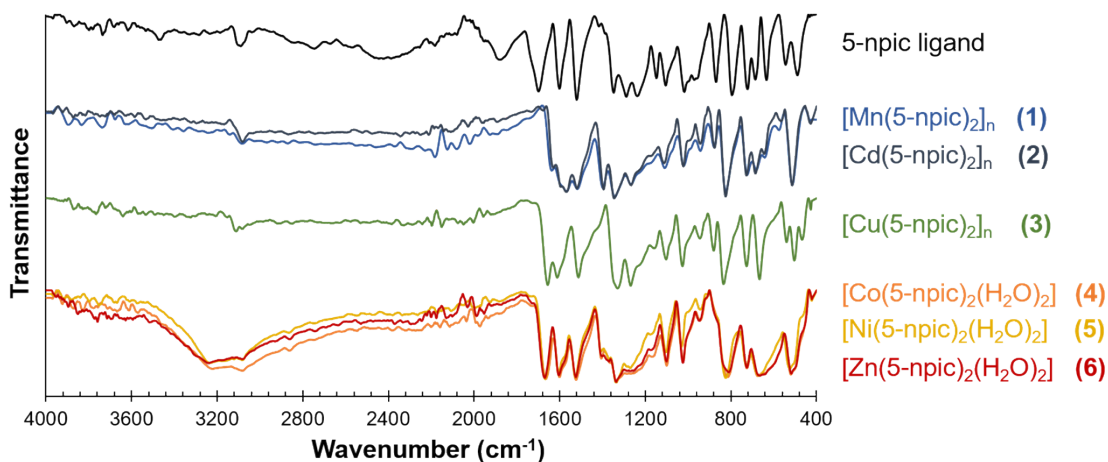

Fig. S1 Infrared spectra of 5-npic and compounds **1-6** in solid state in the range 4000-400  $\text{cm}^{-1}$  at room temperature.

Table S3 IR bands ( $\text{cm}^{-1}$ ) in the range 4000-400  $\text{cm}^{-1}$  of 5-npic and compounds **1-6**.

|                                        | 5-npic       | 1            | 2            | 3            | 4            | 5            | 6            |
|----------------------------------------|--------------|--------------|--------------|--------------|--------------|--------------|--------------|
| $\delta(\text{O-H})$                   |              |              |              |              | 3219         | 3232         | 3238         |
| $\nu(\text{C-H})_{\text{aromatic}}$    | 3090<br>3078 | 3082         | 3080         | 3111<br>3082 | 3082         | 3082         | 3082         |
| $\nu(\text{C=O})$                      | 1728<br>1699 | 1635<br>1587 | 1629<br>1595 | 1655         | 1664         | 1668         | 1670         |
| $\nu(\text{C=C})$                      | 1601         | 1568         | 1568         | 1610         | 1601         | 1604         | 1604         |
| $\nu_{\text{asym}}(\text{N-O})$        | 1520         | 1518         | 1518         | 1512         | 1523         | 1525         | 1525         |
| $\nu_{\text{sym}}(\text{N-O})$         | 1348         | 1398         | 1394         | 1329         | 1334         | 1335         | 1336         |
| $\nu(\text{C-N})$                      | 1288         | 1342         | 1346         | 1267         | 1267         | 1269         | 1267         |
| $\delta(\text{C-H})_{\text{in-plane}}$ | 1236<br>1018 | 1261<br>1020 | 1267<br>1022 | 1226<br>1026 | 1222<br>1022 | 1234<br>1030 | 1230<br>1024 |
| $\delta(\text{C-C-C})_{\text{ring}}$   | 792          | 823          | 823          | 833          | 815          | 823          | 810          |

### S3. Photophysical properties

**Fig. S2** UV-vis absorption spectra in water (left) and emission spectra (right) of the ligand (black), compound **2** (red) and compound **6** (blue). Stokes shift estimated using the average value of the two bands at 283 and 248 nm of the absorption spectra and the main band at 485 nm of the emission spectra.

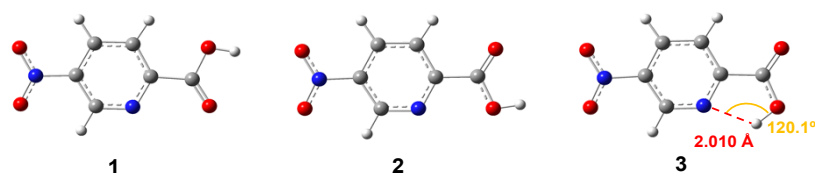

**Fig. S3** Optimized conformations of 5-npic acid at the CAM-B3LYP/6-31G\*\* level of theory in water solution.

**Table S4** Energy (in Hartrees) of the three 5-nitrobenzoic acid conformers, energy difference ( $\Delta E$ , kcal/mol) with respect to the most stable conformer and dipole moment ( $\mu$ , in Debye) calculated at the CAM-B3LYP/6-31G\*\* level of theory in the gas phase and water solution.

| Phase | Conformer | Energy      | $\Delta E$ | $\mu$ |
|-------|-----------|-------------|------------|-------|
| Gas   | <b>1</b>  | -641.089791 | 4.03       | 4.10  |
|       | <b>2</b>  | -641.092370 | 2.42       | 2.47  |
|       | <b>3</b>  | -641.096220 | 0.00       | 1.15  |
| Water | <b>1</b>  | -641.103986 | 3.07       | 5.31  |
|       | <b>2</b>  | -641.104914 | 2.48       | 2.88  |
|       | <b>3</b>  | -641.108871 | 0.00       | 1.55  |

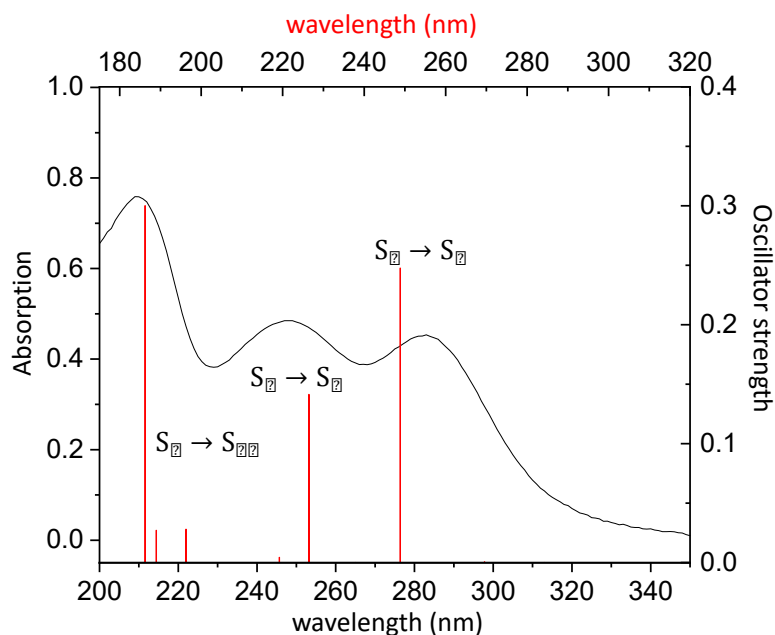

**Fig. S4** Experimental absorption spectrum of 5-npic along with the oscillator strength of the vertical electronic transitions calculated at the TD-CAM-B3LYP/6-31G\*\* level of theory in water solution. The bottom axis refers to the experimental absorption spectrum and the top axis to the calculated electronic transitions.

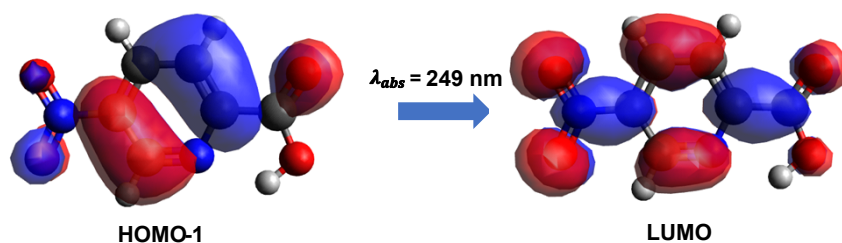

**Fig. S5** Molecular orbital representation (isocontour plots 0.02 a.u.) of the electronic transition  $S_0 \rightarrow S_4$  calculated at the CAM-B3LYP/6-31G\*\* level of theory in water solution for the **conformer 3** of the ligand.

**Table S5** Experimental absorption wavelength ( $\lambda_{ab}^{exp}$ ), theoretical vertical electronic transitions ( $\lambda_{vert-ab}^{calc}$ ), oscillator strength ( $f$ ), and the main molecular orbital contributions ( $\geq 15\%$ ) calculated at the CAM-B3LYP/6-31G\*\* level of theory in water solution for the **conformer 3** of the ligand.

| $\lambda_{ab}^{exp}$<br>eV (nm) | $\lambda_{vert-ab}^{calc}$<br>eV (nm) | Transition               | $f$  | Contribution (%)                |
|---------------------------------|---------------------------------------|--------------------------|------|---------------------------------|
|                                 | 4.01 (309)                            | $S_0 \rightarrow S_1$    | 0.00 | HOMO-3 $\rightarrow$ LUMO (80%) |
| 4.38 (283)                      | 4.98 (249)                            | $S_0 \rightarrow S_4$    | 0.25 | HOMO-1 $\rightarrow$ LUMO (88%) |
| 5.00 (248)                      | 5.48 (226)                            | $S_0 \rightarrow S_6$    | 0.14 | HOMO-4 $\rightarrow$ LUMO (69%) |
|                                 | 6.32 (196)                            | $S_0 \rightarrow S_8$    | 0.03 | HOMO-5 $\rightarrow$ LUMO (33%) |
| 5.93 (209)                      | 6.66 (186)                            | $S_0 \rightarrow S_{10}$ | 0.30 | HOMO-6 $\rightarrow$ LUMO (50%) |

**Table S6** Experimental emission ( $\lambda_{emis}^{exp}$ ), theoretical transition ( $\lambda_{vert-emis}^{calc}$ ), and oscillator strength ( $f$ ) for the  $S_1 \rightarrow S_0$  ( $\geq 15\%$ ) calculated at the CAM-B3LYP/6-31G\*\* level of theory in the gas phase and water solution for the **conformer 3** of the ligand.

| Phase | $\lambda_{emis}^{exp}$<br>eV (nm) | $\lambda_{vert-emis}^{calc}$<br>eV (nm) | Transition            | $f$  | Contribution (%)              |
|-------|-----------------------------------|-----------------------------------------|-----------------------|------|-------------------------------|
| Gas   | 2.56 (485)                        | 2.03 (610)                              | $S_1 \rightarrow S_0$ | 0.00 | LUMO $\rightarrow$ HOMO (86%) |
| Water | 2.56 (485)                        | 2.37 (523)                              | $S_1 \rightarrow S_0$ | 0.00 | LUMO $\rightarrow$ HOMO (92%) |

**Table S7** Experimental absorption wavelength ( $\lambda_{ab}^{exp}$ ), theoretical vertical electronic transitions ( $\lambda_{vert-ab}^{calc}$ ), oscillator strength ( $f$ ), and the main molecular orbital contributions ( $\geq 15\%$ ) calculated at the CAM-B3LYP-D3/6-31G\*\*+LANL2DZ level of theory in water solution for **6** (LANL2DZ for Zn, 6-31G\*\* for C, H, N, and O).

| $\lambda_{ab}^{exp}$<br>eV (nm) | $\lambda_{vert-ab}^{calc}$<br>eV (nm) | $\Delta E$<br>(eV) | Transition               | $f$  | Contribution (%)                                                       |
|---------------------------------|---------------------------------------|--------------------|--------------------------|------|------------------------------------------------------------------------|
| 4.38 (283)                      | 4.58 (271)                            | 0.17               | $S_0 \rightarrow S_7$    | 0.28 | HOMO-8 $\rightarrow$ LUMO (43%)<br>HOMO-4 $\rightarrow$ LUMO (41%)     |
| 4.98 (249)                      | 4.93 (251)                            | -0.05              | $S_0 \rightarrow S_{11}$ | 0.27 | HOMO-6 $\rightarrow$ LUMO+1 (52%)<br>HOMO-3 $\rightarrow$ LUMO+1 (27%) |
| 5.79 (214)                      | 7.52 (165)                            | 1.73               | $S_0 \rightarrow S_{66}$ | 0.93 | HOMO-6 $\rightarrow$ LUMO+5 (20%)                                      |

**Table S8** Experimental absorption wavelength ( $\lambda_{abs}^{exp}$ ), theoretical vertical electronic transitions ( $\lambda_{vert-ab}^{calc}$ ), oscillator strength ( $f$ ), and the main molecular orbital contributions ( $\geq 15\%$ ) calculated at the ONIOM(CAM-B3LYP-D3:PM6) level of theory in the gas phase for **6** (LANL2DZ for Zn, 6-31G\*\* for C, H, N, and O).

| $\lambda_{abs}^{exp}$<br>eV (nm) | $\lambda_{vert-ab}^{calc}$<br>eV (nm) | Transition               | $f$  | % Contribution                                                                                                                                      |
|----------------------------------|---------------------------------------|--------------------------|------|-----------------------------------------------------------------------------------------------------------------------------------------------------|
| 4.38 (283)                       | 4.58 (271)                            | $S_0 \rightarrow S_9$    | 0.10 | HOMO-3 $\rightarrow$ LUMO+1 (29%),<br>HOMO-2 $\rightarrow$ LUMO (38%)                                                                               |
| 4.98 (249)                       | 5.13(242)                             | $S_0 \rightarrow S_{15}$ | 0.38 | HOMO-7 $\rightarrow$ LUMO+1 (27%),<br>HOMO-6 $\rightarrow$ LUMO (36%)                                                                               |
|                                  | 5.69(218)                             | $S_0 \rightarrow S_{24}$ | 0.17 | HOMO-2 $\rightarrow$ LUMO+2 (20%)                                                                                                                   |
| 5.79 (214)                       | 6.66 (186)                            | $S_0 \rightarrow S_{43}$ | 0.40 | HOMO-15 $\rightarrow$ LUMO+1 (20%),<br>HOMO-14 $\rightarrow$ LUMO (22%),<br>HOMO-7 $\rightarrow$ LUMO+3 (18%),<br>HOMO-6 $\rightarrow$ LUMO+2 (20%) |

**Table S9** Experimental absorption wavelength ( $\lambda_{ab}^{exp}$ ), theoretical vertical electronic transitions ( $\lambda_{vert-ab}^{calc}$ ), oscillator strength ( $f$ ), and the main molecular orbital contributions ( $\geq 15\%$ ) calculated at the CAM-B3LYP-D3/6-31G\*\* level of theory for **2** (LANL2DZ for Cd, 6-31G\*\* for C, H, N, and O).

| Fragment    | $\lambda_{abs}$<br>eV (nm) | $\lambda_{vert-ab}$<br>eV (nm) | Transition                | $f$  | % Contribution                                                           |
|-------------|----------------------------|--------------------------------|---------------------------|------|--------------------------------------------------------------------------|
| <b>f1Cd</b> |                            | 4.67 (266)                     | $S_0 \rightarrow S_{45}$  | 0.05 | HOMO-8 $\rightarrow$ LUMO+1 (18%)                                        |
|             | 4.38(283)                  | 4.84 (256)                     | $S_0 \rightarrow S_{57}$  | 0.16 | HOMO-11 $\rightarrow$ LUMO+3 (23%),<br>HOMO-9 $\rightarrow$ LUMO+3 (25%) |
|             | 4.98 (249)                 | 4.88 (254)                     | $S_0 \rightarrow S_{60}$  | 0.22 | HOMO-18 $\rightarrow$ LUMO (24%)                                         |
|             | 5.79(214)                  | 5.26 (236)                     | $S_0 \rightarrow S_{76}$  | 0.11 | HOMO-22 $\rightarrow$ LUMO+1 (27%)<br>HOMO-21 $\rightarrow$ LUMO+1 (24%) |
| <b>f4Cd</b> |                            | 4.32 (287)                     | $S_0 \rightarrow S_{52}$  | 0.01 | < 15%                                                                    |
|             |                            | 4.61 (269)                     | $S_0 \rightarrow S_{87}$  | 0.02 | HOMO-8 $\rightarrow$ LUMO+10 (53%)                                       |
|             |                            | 4.67 (266)                     | $S_0 \rightarrow S_{95}$  | 0.04 | < 15%                                                                    |
|             | 4.38(283)                  | 4.84 (256)                     | $S_0 \rightarrow S_{132}$ | 0.17 | < 15%                                                                    |
|             | 4.98 (249)                 | 4.92 (252)                     | $S_0 \rightarrow S_{147}$ | 0.12 | < 15%                                                                    |
|             | 5.79(214)                  | 5.32(233)                      | $S_0 \rightarrow S_{238}$ | 0.09 | HOMO-51 $\rightarrow$ LUMO+4 (29%)                                       |



#### S4. Cytotoxicity in cancer cell lines

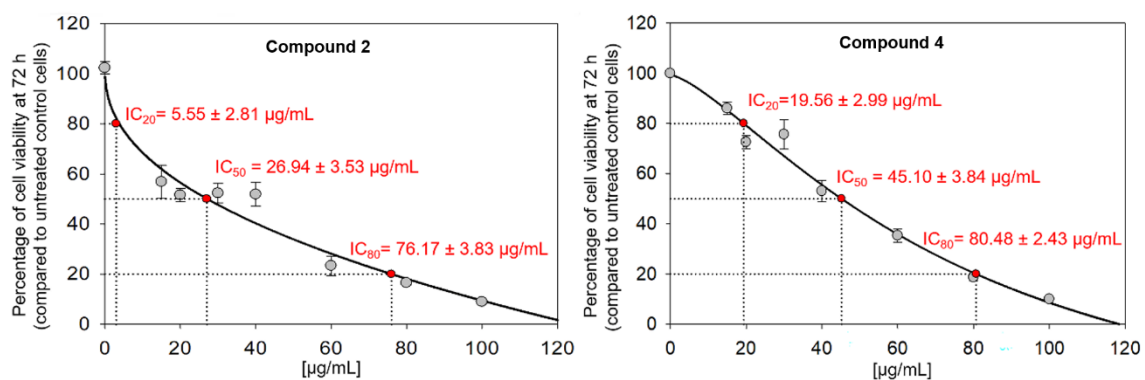

**Fig. S6** Effect of **2** and **4** on cell proliferation in B16-F10 murine melanoma cells after 72 h of treatment in a range of concentration from 0 to 100  $\mu\text{g}\cdot\text{mL}^{-1}$ . Each point represents the mean value  $\pm$  SD of at least two independent experiments performed in triplicate.

## S5. Chemical stability in solution

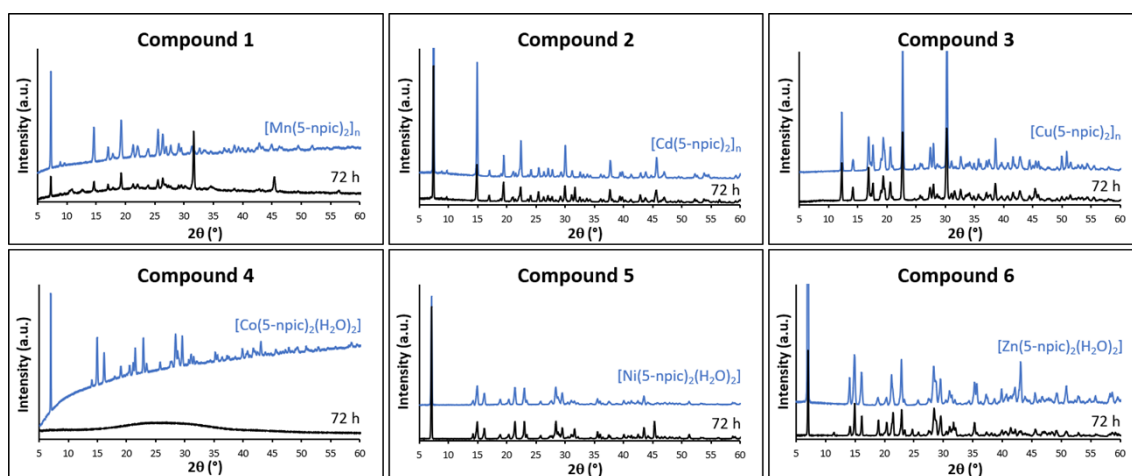

**Fig S7.** Powder X-ray diffraction patterns of complexes **1-6** after 72 h in PBS solution (black lines) compared to the original ones (blue lines). The patterns are registered from 5° to 60° with a step size of 0.02° and scan rate of 40 s *per* step.

## S6. Cytotoxic mechanism

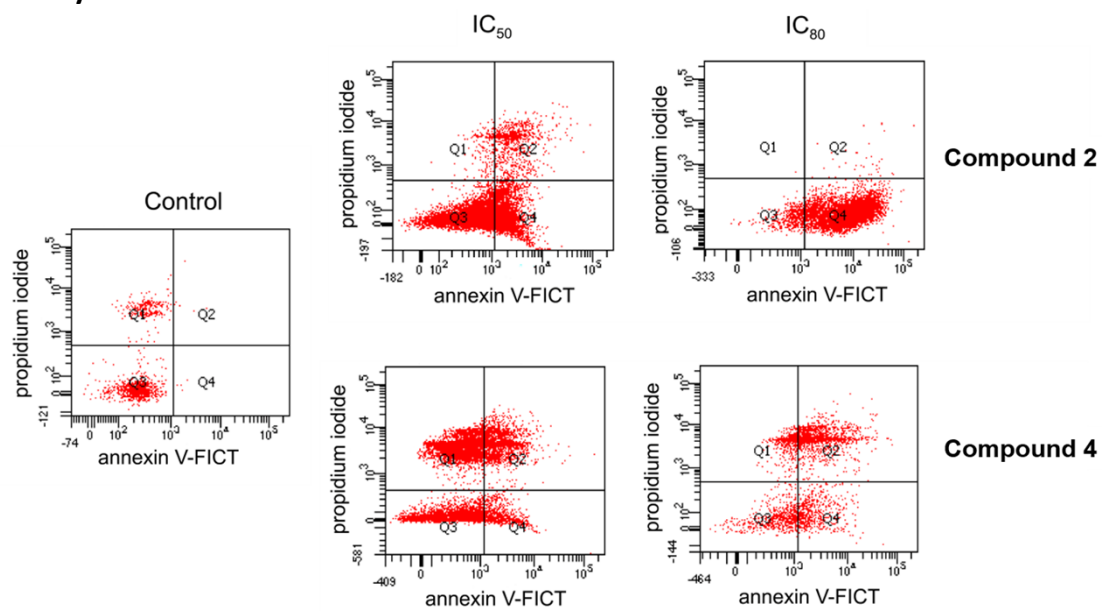

**Fig. S8** Diagrams of annexin V/PI flow cytometry: Q1 (necrotic cells), Q2 (late apoptotic cells), Q3 (Viable cells), Q4 (early apoptotic cells).

## S7. Anti-inflammatory studies

**Table S10** Growth-inhibitory effects of ligand and compounds **1-6** on RAW 264.7 monocyte/macrophage murine cells.

| Compound | IC <sub>20</sub> (μg·mL <sup>-1</sup> ) | IC <sub>50</sub> (μg·mL <sup>-1</sup> ) | IC <sub>80</sub> (μg·mL <sup>-1</sup> ) |
|----------|-----------------------------------------|-----------------------------------------|-----------------------------------------|
| <b>L</b> | 47.43 ± 2.41                            | 55.85 ± 0.88                            | 66.46 ± 0.63                            |
| <b>1</b> | 86.99 ± 5.89                            | 134.38 ± 19.10                          | 165.91 ± 11.46                          |
| <b>2</b> | 1.96 ± 0.11                             | 21.68 ± 0.06                            | 74.86 ± 0.51                            |
| <b>3</b> | 67.67 ± 4.15                            | 86.90 ± 0.12                            | 105.16 ± 4.96                           |
| <b>4</b> | 39.85 ± 11.19                           | 56.48 ± 3.69                            | 71.88 ± 2.32                            |
| <b>5</b> | 47.67 ± 2.33                            | 59.32 ± 2.54                            | 74.32 ± 3.40                            |
| <b>6</b> | 29.05 ± 1.06                            | 33.25 ± 0.57                            | 38.76 ± 0.29                            |

## S8. Elemental analysis

**Table S11** Elemental analyses (weight, %) of all obtained compounds.

| Compound | Formula                                                          | Yield <sup>a</sup> (%) | Theoretical / Experimental (%) |             |               |
|----------|------------------------------------------------------------------|------------------------|--------------------------------|-------------|---------------|
|          |                                                                  |                        | C                              | H           | N             |
| <b>1</b> | C <sub>12</sub> H <sub>6</sub> MnN <sub>4</sub> O <sub>8</sub>   | 97                     | 37.04 / 36.96                  | 1.55 / 1.79 | 14.40 / 14.68 |
| <b>2</b> | C <sub>12</sub> H <sub>6</sub> CdN <sub>4</sub> O <sub>8</sub>   | 92                     | 32.27 / 32.24                  | 1.35 / 1.56 | 12.54 / 12.63 |
| <b>3</b> | C <sub>12</sub> H <sub>6</sub> CuN <sub>4</sub> O <sub>8</sub>   | 75                     | 36.23 / 35.72                  | 1.52 / 1.70 | 14.09 / 14.32 |
| <b>4</b> | C <sub>12</sub> H <sub>10</sub> CoN <sub>4</sub> O <sub>10</sub> | 93                     | 33.58 / 33.62                  | 2.35 / 2.64 | 13.05 / 13.37 |
| <b>5</b> | C <sub>12</sub> H <sub>10</sub> NiN <sub>4</sub> O <sub>10</sub> | 80                     | 33.60 / 33.51                  | 2.35 / 2.72 | 13.06 / 13.20 |
| <b>6</b> | C <sub>12</sub> H <sub>10</sub> ZnN <sub>4</sub> O <sub>10</sub> | 77                     | 33.08 / 32.79                  | 2.31 / 2.56 | 12.86 / 12.95 |

<sup>a</sup> Yield based on metal

## S9. Single-crystal X-ray crystallographic data

**Table S12** Crystallographic data and structure refinement details.

|                                                | <b>1</b>                                                       | <b>2</b>                                                       | <b>3</b>                                                       | <b>4</b>                                                         | <b>5</b>                                                         | <b>6</b>                                                         |
|------------------------------------------------|----------------------------------------------------------------|----------------------------------------------------------------|----------------------------------------------------------------|------------------------------------------------------------------|------------------------------------------------------------------|------------------------------------------------------------------|
| <b>Formula</b>                                 | C <sub>12</sub> H <sub>6</sub> MnN <sub>4</sub> O <sub>8</sub> | C <sub>12</sub> H <sub>6</sub> CdN <sub>4</sub> O <sub>8</sub> | C <sub>12</sub> H <sub>6</sub> CuN <sub>4</sub> O <sub>8</sub> | C <sub>12</sub> H <sub>10</sub> CoN <sub>4</sub> O <sub>10</sub> | C <sub>12</sub> H <sub>10</sub> NiN <sub>4</sub> O <sub>10</sub> | C <sub>12</sub> H <sub>10</sub> ZnN <sub>4</sub> O <sub>10</sub> |
| <b>CCDC</b>                                    | 2295415                                                        | 2295418                                                        | 2295419                                                        | 2295416                                                          | 2295417                                                          | 2295420                                                          |
| <b>M<sub>r</sub> (g·mol<sup>-1</sup>)</b>      | 389.15                                                         | 446.61                                                         | 397.75                                                         | 429.17                                                           | 428.95                                                           | 435.61                                                           |
| <b>T (K)</b>                                   | 296.15                                                         | 296.15                                                         | 296.15                                                         | 100.00                                                           | 100.00                                                           | 293(2)                                                           |
| <b>Crystal system</b>                          | Monoclinic                                                     | Monoclinic                                                     | Monoclinic                                                     | Monoclinic                                                       | Monoclinic                                                       | Monoclinic                                                       |
| <b>Space group</b>                             | <i>P2<sub>1</sub></i>                                          | <i>P2<sub>1</sub></i>                                          | <i>P2<sub>1</sub>/c</i>                                        | <i>P2<sub>1</sub>/n</i>                                          | <i>P2<sub>1</sub>/n</i>                                          | <i>P2<sub>1</sub>/n</i>                                          |
| <b>a (Å)</b>                                   | 10.4325(17)                                                    | 10.5242(0)                                                     | 6.4800(8)                                                      | 5.0247(5)                                                        | 5.0700(7)                                                        | 5.0950(3)                                                        |
| <b>b (Å)</b>                                   | 5.3198(7)                                                      | 5.4425(4)                                                      | 10.0354(12)                                                    | 25.069(3)                                                        | 24.784(4)                                                        | 25.1353(16)                                                      |
| <b>c (Å)</b>                                   | 12.7174(15)                                                    | 12.4602(13)                                                    | 10.6890(11)                                                    | 6.4693(7)                                                        | 6.4982(13)                                                       | 6.5334(4)                                                        |
| <b>α (°)</b>                                   | 90                                                             | 90                                                             | 90                                                             | 90                                                               | 90                                                               | 90                                                               |
| <b>β (°)</b>                                   | 108.111(4)                                                     | 107.135(3)                                                     | 106.370(4)                                                     | 111.501(4)                                                       | 111.764(6)                                                       | 110.793(3)                                                       |
| <b>γ (°)</b>                                   | 90                                                             | 90                                                             | 90                                                             | 90                                                               | 90                                                               | 90                                                               |
| <b>V (Å<sup>3</sup>)</b>                       | 670.83(16)                                                     | 662.02(11)                                                     | 666.92(13)                                                     | 758.20(15)                                                       | 758.3(2)                                                         | 782.20(8)                                                        |
| <b>Z</b>                                       | 2                                                              | 2                                                              | 2                                                              | 2                                                                | 2                                                                | 2                                                                |
| <b>ρ (g·cm<sup>-3</sup>)</b>                   | 1.927                                                          | 2.175                                                          | 1.981                                                          | 1.880                                                            | 1.879                                                            | 1.850                                                            |
| <b>μ (mm<sup>-1</sup>)</b>                     | 1.044                                                          | 1.660                                                          | 1.697                                                          | 1.202                                                            | 1.350                                                            | 1.638                                                            |
| <b>GoF on F<sup>2</sup></b>                    | 1.014                                                          | 0.997                                                          | 1.045                                                          | 1.260                                                            | 1.169                                                            | 1.047                                                            |
| <b>R<sub>1</sub><sup>a</sup> [I&gt;2σ(I)]</b>  | 0.0543                                                         | 0.0387                                                         | 0.0280                                                         | 0.0566                                                           | 0.0654                                                           | 0.0570                                                           |
| <b>R<sub>1</sub><sup>a</sup> [all data]</b>    | 0.0799                                                         | 0.0475                                                         | 0.0323                                                         | 0.1128                                                           | 0.1532                                                           | 0.1027                                                           |
| <b>wR<sub>2</sub><sup>b</sup> [I&gt;2σ(I)]</b> | 0.0992                                                         | 0.0725                                                         | 0.0784                                                         | 0.1366                                                           | 0.1547                                                           | 0.0846                                                           |
| <b>wR<sub>2</sub><sup>b</sup> [all data]</b>   | 0.1125                                                         | 0.0771                                                         | 0.0805                                                         | 0.1934                                                           | 0.2380                                                           | 0.0955                                                           |

$${}^a R_1 = \frac{\sum ||F_o| - |F_c||}{\sum |F_o|}, {}^b wR_2 = \left[ \frac{\sum w(|F_o|^2 - |F_c|^2)^2}{\sum w(|F_o|^2)^2} \right]^{1/2}$$

## S10. Theoretical calculations

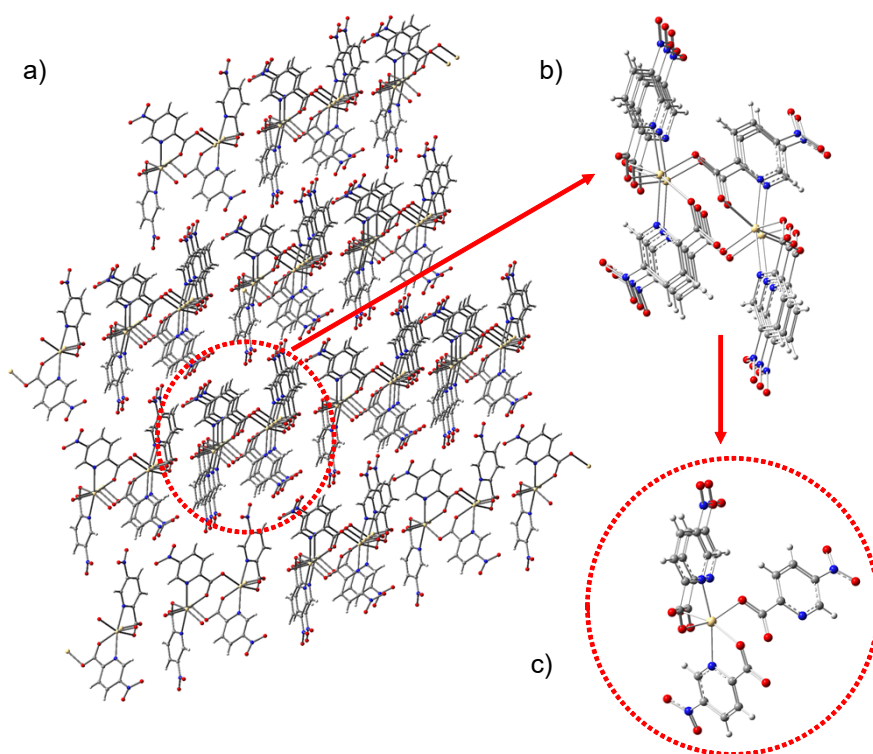

**Fig. S9** Molecular representation of **2**: (a) schematic representation of the coordination compound; (b) **f4Cd** fragment containing four Cd atoms, and (c) **f1Cd** fragment containing one Cd atom.

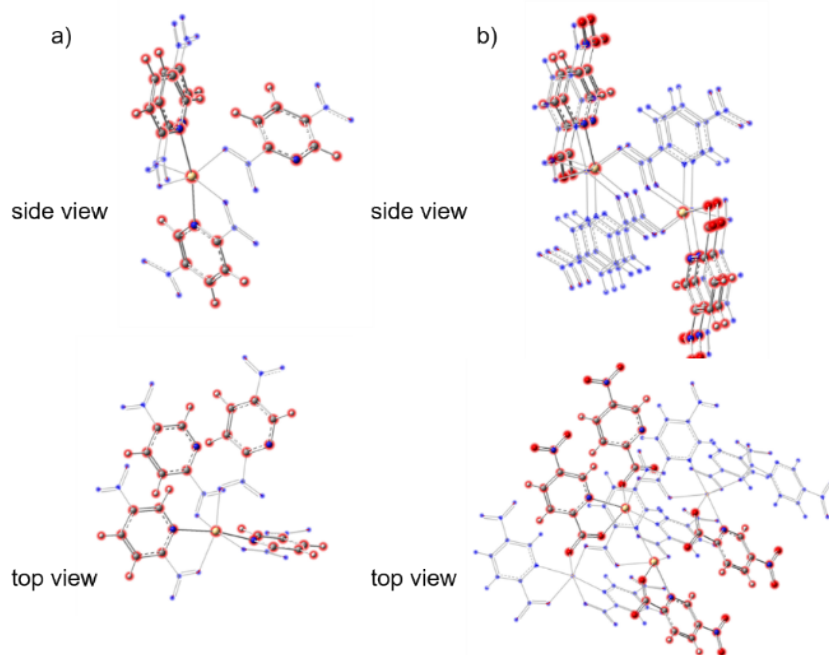

**Fig. S10** (a) **f1Cd** fragment and (b) **f4Cd** fragment for **2**. The molecular geometry of the active part of the fragment (in red) has been optimized at the CAM-B3LYP-D3/6-31G\*\*+LANL2DZ level of theory while the cartesian coordinates of the surrounding molecules (in blue) are frozen.

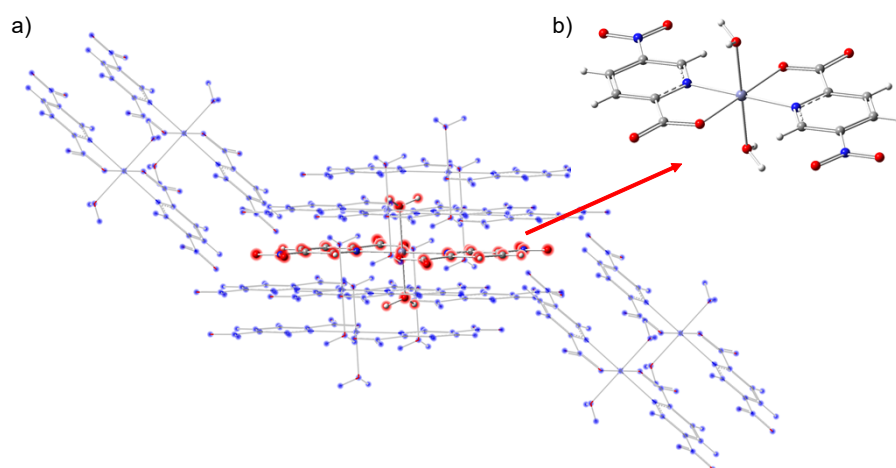

**Fig. S11** (a) ONIOM model cluster of compound **6**. (b) The active molecule (in red) is treated as high level (CAM-B3LYP-D3/6-31G\*\*+LANL2DZ) and the surrounding molecules (in blue) as low level (PM6).
